# Supplementary material for: Population pharmacokinetics of levodopa/carbidopa microtablets in healthy subjects and Parkinson’s disease patients
Source: PubMed Central journal article supplement (PMC6132549; doi:10.1007/s00228-018-2497-2), 2018-06-07
Supplement: 228_2018_2497_MOESM1_ESM.pdf [file 228_2018_2497_MOESM1_ESM.pdf]

# Population pharmacokinetics of levodopa/carbidopa microtablets in healthy subjects and Parkinson's disease patients

European Journal of Clinical Pharmacology

---

Marina Senek<sup>1,2</sup> PhD, Dag Nyholm<sup>1</sup> MD PhD, Elisabet I Nielsen<sup>2</sup> PhD

<sup>1</sup>Department of Neuroscience, Neurology, Uppsala University, Sweden<sup>1</sup>

<sup>2</sup>Department of Pharmaceutical Biosciences, Uppsala University, Sweden<sup>2</sup>

Marina Senek, corresponding author, ORCID 0000-0003-0302-6946

Department of Neuroscience, Neurology

Uppsala University

Akademiska Sjukhuset/Uppsala University Hospital

751 85 Uppsala, Sweden

E-mail: marina.senek@neuro.uu.se

---

<sup>1</sup> Uppsala University Hospital, 751 85 Uppsala, Sweden

<sup>2</sup> Uppsala biomedicinska centrum BMC, Husarg. 3, Box 591, 751 24 UPPSALA

## Bioanalysis

The methods used were validated in agreement with the ICH Validation of Analytical Procedures<sup>1</sup> and the Guideline on Bioanalytical Method Validation<sup>2</sup>.

### Levodopa/carbidopa microtablets in healthy subjects (Study 1 and 3)<sup>3,4</sup>

Blood samples were immediately centrifuged (10 min, 3100 rpm) after collection in EDTA tubes containing 143 IU of heparin. The samples were stored frozen (-75°C) until analysis after addition of 50 µL 10% sodium metabisulfite solution. The plasma samples were thawed, and after protein precipitation, the plasma concentrations of levodopa and carbidopa were determined (limits of quantification (LOQ) were 12 and 15 ng/mL respectively) (Supplementary Table 1).

### Levodopa/carbidopa microtablets in patients (Study 2)<sup>5</sup>

Collected blood samples (in EDTA tubes) were stored on ice, centrifuged within 1 hour (20 min, Sorvall SL50T, 3900 rpm), and stored frozen at -80 °C until analysis. The plasma samples were thawed, and after protein precipitation, the plasma concentrations of levodopa and carbidopa were determined (limits of quantification (LOQ) were 10 and 20 ng/mL respectively) (Supplementary table 1). The analysis was conducted at The Department of Pharmacology, University of Gothenburg, Sweden.

Supplementary Table 1. Bioanalysis equipment

|                       | Study 1 and 3                                                                                                  | Study 2                                                                                                                     |
|-----------------------|----------------------------------------------------------------------------------------------------------------|-----------------------------------------------------------------------------------------------------------------------------|
| <b>Chromatography</b> | HPLC (2250 Bischoff)                                                                                           | HPLC (Dionex Ultimate 3000 pump)                                                                                            |
| <b>Detector</b>       | Coulochem II multi-electrode detector ESA (Chelmsford, Mass)                                                   | Waters 450 amperometric detector                                                                                            |
| <b>Column</b>         | C18-AQ particle size 5 µm guard column (Reprosil-Pur)                                                          | C18 reverse phase column (Onyx) 2.0 mm x 200 mm                                                                             |
| <b>Mobile phase</b>   | 100-mmol/L sodium dihydrogen orthophosphate, pH 3.0, containing 0.5-mmol/L OSA, 1-mmol/L EDTA, and 7% methanol | 50 mmol/L phosphate buffer, pH 2.88 with EDTA 10 mg/L, methanol 4.0%, acetonitrile 1.5% and 1-octanesulphonic acid 100 mg/L |
| <b>Tray cooling</b>   | +5 °C                                                                                                          | +4 °C                                                                                                                       |

HPLC, High performance liquid chromatography; UPLC, Ultra performance liquid chromatography.

## References

1. ICH Topic Q 2 B, Validation of Analytical Procedures: Methodology, Note for guidance on validation of analytical procedures (CPMP/ICH/281/95).
2. EUROPEAN MEDICINES AGENCY. Guideline on bioanalytical method validation. *Committee for Medicinal Products for Human Use (CHMP)*. 2011.
3. Nyholm D, Lewander T, Gomes-Trolin C, et al. Pharmacokinetics of levodopa/carbidopa microtablets versus levodopa/benserazide and levodopa/carbidopa in healthy volunteers. *Clin Neuropharmacol*. 2012;35:111–117.
4. Nyholm D, Ehrnebo M, Lewander T, et al. Frequent administration of levodopa/carbidopa microtablets vs levodopa/carbidopa/entacapone in healthy volunteers. *Acta Neurol Scand*. 2013;127:124–132.
5. Senek M, Aquilonius S-M, Askmark H, et al. Levodopa/carbidopa microtablets in Parkinson's disease: a study of pharmacokinetics and blinded motor assessment. *Eur J Clin Pharmacol*. 2017;73:563–571.
